1           **COGNITIVE ENDOPHENOTYPES OF MODERN AND EXTINCT**  
2           **HOMININS ASSOCIATED WITH *NTNG* GENE PARALOGS**

3

4 Pavel Prosselkov<sup>1,2\*</sup>, Ryota Hashimoto<sup>3,4</sup>, Denis Polygalov<sup>5</sup>, Kazutaka Ohi<sup>3,4</sup>, Qi Zhang<sup>1</sup>,  
5 Thomas J. McHugh<sup>5</sup>, Masatoshi Takeda<sup>3,4</sup> and Shigeyoshi Itohara<sup>1\*</sup>

6

7 <sup>1</sup>Laboratory of Behavioral Genetics, RIKEN Brain Science Institute, Wakoshi, 351-0198  
8 Saitama, Japan

9 <sup>2</sup>Graduate School, Department of Veterinary Medicine, Faculty of Agriculture, Tokyo  
10 University, 113-8657 Tokyo, Japan

11 <sup>3</sup>Department of Psychiatry, Osaka University Graduate School of Medicine, Osaka, Japan

12 <sup>4</sup>Molecular Research Center for Children's Mental Development, United Graduate School of  
13 Child Development, Osaka University, Kanazawa University and Hamamatsu University  
14 School of Medicine, Osaka, Japan

15 <sup>5</sup>Laboratory of Circuit and Behavior Physiology, RIKEN Brain Science Institute, 351-0198  
16 Saitama, Japan

17

18 \*corresponding authors:

19           prosselkov@brain.riken.jp

20           sitohara@brain.riken.jp

21

22 Keywords: evolution, gene duplication, psychogenetics, cognitive endophenotype,  
23           paleogenetics

24

25

26 **ABSTRACT**

27 **A pair of gene paralogs, *NTNG1* and *NTNG2*, contributes to the Intellectual Quotient**  
28 **(IQ) test scores in a complementary manner. Single nucleotide polymorphisms (SNPs)**  
29 **of *NTNG1* are associated with attenuated verbal comprehension (VC) or processing**  
30 **speed (PS) while *NTNG2* SNPs affect working memory (WM), and perceptual**  
31 **organization (PO) forming cognitive endophenotypes in healthy and schizophrenia**  
32 **(SCZ)-affected human subjects. Regions of interest (ROIs), defined as 21 nucleotide**  
33 **(nu) long loci embedding the IQ-affecting mutation alleles, underwent dramatic**  
34 **evolutionary changes from mice through primates to hominin gene orthologs, and**  
35 **resulted in accelerated evolution of VC and WM/PO affecting ROIs. Mutation alleles**  
36 **associated with the higher VC and WM IQ scores are found in genomes of extinct**  
37 **hominins of Neolithic times, however, lower WM scores associated allele is detectable in**  
38 **Mesolithic hunters genomes. Protein sequence of *NTNG1* is 100% conserved among the**  
39 **archaic and modern extinct hominins while *NTNG2* underwent a recent selection sweep**  
40 **encoding a primate-specific S371A/V (~50,000 yrs BC), and a modern human (5,300 yrs**  
41 **BC) T346A substitutions. Hereby, we show that a 500 mln yrs old genomic duplication**  
42 **of a synapse primordial gene of an urochordate provided a substrate for further**  
43 **synapse elaborations and its ultimate capacitive expansion of what evolved into a**  
44 **vertebrate cognitive superior complexity – intelligence.**

45

## 45 INTRODUCTION

46 In 1970 S. Ohno ingeniously proposed that new gene function can result from a gene  
47 duplication and following it gene paralogs SF (**Ohno, 1970**). Two gene paralogs, *NTNG1* and  
48 *NTNG2*, expressed predominantly in the brain (**Nakashiba et al., 2002**), and encoding  
49 Netrin-G1 and Netrin-G2 proteins, respectively, are localised pre-synaptically and segregate  
50 in a non-overlapping manner into distinct neuronal circuits (**Nishimura-Akiyoshi et al.,**  
51 **2007; Matsukawa et al., 2014**). They are related to the netrin family of axonal guidance cues  
52 (**Sun et al., 2011**) but differ in that they attach to the axonal membrane via a  
53 glycosylphosphatidylinositol (GPI) link (**Yu et al., 2013; Sevcsik et al., 2015**), a known lipid  
54 raft-associated membrane signaling cascade organiser (**Klotzsch and Schutz, 2013; Yu et al.,**  
55 **2013**). The first evolutionary precursor of *NTNG* as a single gene copy can be located in the  
56 genome of a primitive vertebrate tunicate/urochordate *Ciona intestinalis* (sea squirt,  
57 ENSCING00000024925), reported to be the first organism with the neural crest primordials  
58 (**Abitua et al., 2012**), multipotent brain progenitor cells (**Stolfi et al., 2015**), and neurogenic  
59 placodes, facilitating the transition from pelagic invertebrate life style to a predatory  
60 vertebrate (**Abitua et al., 2015**). The dramatic expansion of human cerebral cortex over the  
61 course of evolution (**Wise, 2008; Preuss, 2012; Geschwind and Rakic, 2013; Belmonte et**  
62 **al., 2015**) had provided new niches for accommodating either *de novo* or advancing pre-  
63 existed cognitive features and culminating in the positively selected human cognitive  
64 functions (**Joshi et al., 2015**).

65 IQ tests are a surrogate measure of general human cognitive ability characterising  
66 intelligence. They are often administered as WAIS-III/IV (**Wechsler, 1958**) and represent a  
67 cumulative score of 4 cognitive indices: VC, WM, PO and PS frequently referred as  
68 “cognitive domains” (**Deary et al., 2006**). IQ has been validated by factor analyses  
69 (**Glascher et al., 2009**), and a common factor (correlate) influencing each of them frequently

70 referred as *g*, or “general intelligence”, proposed by Spearman in 1904 (**Spearman, 1904**),  
71 and recently challenged as the only existing correlate (**Hampshire et al., 2012**). IQ is  
72 affected by several mental disorders including schizophrenia (SCZ) characterized by severe  
73 cognitive deficits in WM and behavioral flexibility and resulting in low performance in  
74 several cognitive tests (**Forbes et al., 2009; Leeson et al., 2009; Barnett et al., 2010**). Since  
75 both *NTNG* paralogs have been reported associated with SCZ (**Fukasawa et al., 2004; Aoki-**  
76 **Suzuki et al., 2005; JSSLG et al., 2005; Eastwood and Harrison, 2008; Ohtsuki et al.,**  
77 **2008; Zakharyan et al., 2011; Zhu et al., 2011; Ayalew et al., 2012; Wilcox and Quadri,**  
78 **2014**) we investigated whether these gene paralogs contribute to human intelligence by  
79 assessing the IQ of human carriers for the *NTNG1* and *NTNG2* SNP alleles against non-  
80 carriers with and without SCZ.

81

## 81 RESULTS

82 Several *NTNG1* and *NTNG2* SNPs have been previously reported to be associated with SCZ  
83 (e.g. **Aoki-Suzuki et al., 2005; Ohtsuki et al., 2008**). We have found that out of 11 SNPs  
84 tested, five affect the IQ scores and composite domains in human subjects (**Figure 1,**  
85 **Supplementary Table 1 (ST1)**). SCZ patients carrying rs2218404 T allele (**Figure 1A-1**) of  
86 *NTNG1* (T/G and T/T genotypes, N = 25 patients) compared with G/G genotype (N = 36  
87 patients) demonstrated attenuated full-scale IQ (FIQ, ANCOVA  $p = 0.0057$  (F = 7.80)), and  
88 VIQ ( $p = 0.0033$  (F = 8.87)). VC domain score was the main contributor to the VIQ decline  
89 ( $p = 0.0050$  (F = 8.08), **Figure 1B-1**), with low scores across all parameters except  
90 comprehension (CH): vocabulary (Vc,  $p = 0.020$  (F = 5.49)), similarities (SiM,  $p = 0.041$  (F  
91 = 4.23)), and information (IF,  $p = 0.0067$  (F = 7.50), **Figure 1B-1** lower panel). Thus, a point  
92 mutation in *NTNG1*, rs2218404, is associated with low VC affecting the VIQ via the  
93 attenuated Vc, SiM and IF subscores. The next *NTNG1* SNP found to affect IQ was rs96501,  
94 with attenuated PS in healthy human subjects C allele carriers (N = 45) vs T/T genotypes (N  
95 = 98,  $p = 0.028$  (F = 4.89), **Figure 1B-1**) with no effect on SCZ patients. The contributing  
96 affecting score was symbol search (SS,  $p = 0.053$  (F = 3.79), **Figure 1B-1**, lower panel) with  
97 digit symbol coding (DSC) being also attenuated but non-significantly ( $p = 0.12$  (F = 2.40)).  
98 Three other SNPs mapped to *NTNG2* (**Figure 1A-2**) have been also shown to affect IQ.  
99 Healthy carriers of the *NTNG2* SNP rs1105684 A allele (N = 49) showed a lower FIQ ( $p =$   
100 0.018 (F = 5.70)), VIQ ( $p = 0.029$  (F = 4.90)), and PIQ ( $p = 0.048$  (F = 3.99)) when  
101 compared with the T/T genotypes (N = 96, **Figure 1B-2**). To check for a potential dosage-  
102 dependent effect of a mutation allele on IQ score, *NTNG2* SNP rs2149171 SCZ and healthy  
103 human subject cohorts were each split on 3 genotypes, respectively: C/C (N = 14 and 39),  
104 C/T (N = 29 and 73), and T/T (N = 15 and 30). The presence of the C allele as a single copy  
105 (C/T genotype) was strongly associated with a prominent attenuation in the IQ scores of SCZ

106 patients and was essentially identical to that produced by the C/C genotype when both are  
107 compared to the T allele carriers (FIQ:  $p = 0.014$  ( $F = 4.35$ ); VIQ:  $p = 0.029$  ( $F = 3.60$ ); PIQ:  
108  $p = 0.035$  ( $F = 3.42$ ), **Figure 1B-2**). If in case of *NTNG1* located SNP rs2218404 the lower  
109 VIQ score was contributed mainly by the decreased VC domain scores for Vc, SiM, and IF  
110 (**Figure 1B-1**), in the case of *NTNG2* located rs2149171 the CH and WM domain scores  
111 were responsible for the VIQ decline in C allele carriers ( $p = 0.012$  ( $F = 4.54$ ) for CH and  $p =$   
112  $0.040$  ( $F = 3.27$ ) for WM ( $N = 12$  (C/C);  $N = 25$  (C/T) and  $N = 14$  (T/T)). Similarly to VIQ,  
113 where CH of rs2149171 complements the cognitive endophenotype produced by the T-allele  
114 of rs2218404, the PIQ attenuated score in the case of rs2149171 was due to lower PO score  
115 ( $p = 0.050$  ( $F = 3.04$ ), **Figure 1B-2**) in the C allele carriers. The third *NTNG2* located SNP  
116 found to affect the human IQ was rs2274855 (**Figure 1A-2**) with a cognitive endophenotype  
117 associated with the A-allele presence in SCZ patients ( $N = 33$ ) vs G/G genotypes ( $N = 26$ )  
118 and resembling that of the described above C-allele of rs2149171. Accordingly, the  
119 attenuated scores were: FIQ ( $p = 0.012$  ( $F = 6.44$ )), VIQ ( $p = 0.018$  ( $F = 5.70$ )), and PIQ ( $p =$   
120  $0.036$  ( $F = 4.46$ ), **Figure 1B-2**). Similarly to rs2149171 the lower VIQ score was due to  
121 declined CH ( $p = 0.035$  ( $F = 4.49$ )) but unaffected VC that is contrary (complementary) to the  
122 rs2218404 endophenotype (**Figure 1B-1**). WM was robustly affected by the A-allele  
123 presence ( $N = 29$ ;  $p = 0.023$  ( $F = 5.28$ )) contributed by the low DS score ( $p = 0.026$  ( $F =$   
124  $5.04$ )) with LNS and AM being unaffected (**Figure 1B-2**, lower panel). The observed PO  
125 score was comprised by the declined matrix reasoning (MR,  $p = 0.038$  ( $F = 4.34$ )), block  
126 design (BD,  $p = 0.041$  ( $F = 4.23$ )) with picture completion being unchanged (**Figure 1B-2**,  
127 lower panel). Thus, all three aforementioned *NTNG2* SNPs affect the VIQ and PIQ in human  
128 subjects with the first one contributed by the CH subscore and WM and the latter by the PO  
129 score (**Figure 1C**). Contrary to this, the *NTNG1* located SNP (rs2218404) affects the VIQ  
130 through the lower Vc, SiM and IF scores and affecting the VC domain scores. Another SNP,

131 rs96501, affects PS domain, though in healthy subjects only. It can be concluded that both  
132 genes (as paralogs) contribute to the cognitive scoring produced upon the implemented IQ  
133 testing but in a cognitive domain-complementary manner, *NTNG1* is responsible for the VC  
134 and PS in human while *NTNG2* for the WM and PO domain scores (**Figure 1C**).

135 The robust link observed between a single SNP and affected cognitive domain IQ  
136 score (**Figure 1**) can be explained by some global dramatic perturbations caused by the  
137 presence of a mutated allele and/or a functional importance of its context-dependent  
138 positioning on the gene (**Figure 2A** and **3A**). To determine a potential significance of the  
139 SNP alleles' epistatic environment we compared the nucleotide (nu) sequence within the  
140 immediate vicinity of a SNP allele positioning (50 nu upstream and downstream) in mice,  
141 primates and modern human. We compared all 11 SNPs used for the IQ screening and plotted  
142 the identity percent as a function of distance from the mutated allele position (**Figure 2B** and  
143 **3B**, see **Supplementary Materials = SM**). We found that the identity percent distribution  
144 over the analysed areas of  $\pm 50$  nu is not uniform and displays a SNP allele position-centred  
145 dramatic evolutionary changes pointing towards a potential functional significance of the  
146 immediate vicinity of a SNP as short as  $\pm 10$  nu and not further, referred from here and  
147 beyond as a Region Of Interest (ROI) for each specific SNP allele. We calculated the rates of  
148 evolutionary changes for each ROI as a percent identity change over the lapsed mln yrs of  
149 evolution (**Figure 2C** and **3C**). Among the 6 *NTNG1*-located SNP ROIs three of them  
150 display accelerated rates of evolution from marmoset to chimpanzee (rs2218404, rs628117,  
151 rs96501) when compared to the mouse-marmoset rates, and rs2218404 (affecting VC in  
152 human subjects) additionally demonstrates an accelerated rate of evolution on the  
153 chimpanzee to human path (**Figure 2C**). As for the *NTNG2* located ROIs (**Figure 3-B**),  
154 rs1105684 is remarkably consistent at displaying high evolutionary rates around 0.8 and,  
155 together with rs2274855, both have identical rates at the mouse-marmoset and chimpanzee-

156 human paths, but differ dramatically at the marmoset-chimpanzee point (0.8 vs 0,  
157 respectively). rs2274855 is the only *NTNG2*-nested SNP ROI which underwent an AE from  
158 chimpanzee to human. Next we compared the DNA sequences of all 11 ROIs across mice,  
159 primates and extinct hominins *NTNG* gene paralogs (see **ST2** for the datasets sources used  
160 for the genes reconstruction). T-allele of rs2218404 is detectable in marmoset and in mouse  
161 its position corresponds to adenosine (**Figure 2D**). G-allele (associated with a higher VC  
162 score comparing to the human T-allele carriers) is found in Mesolithic hunter Loschbour  
163 (8,000 BC) but not in another ancient hunter Motala12 and is also present in other two  
164 hominins belonging to the Neolithic period, Iceman and Eskimos (5,300 and 4,000 yrs BC,  
165 respectively). rs628117 is the only *NTNG1*-related mutation near vicinity of which ( $\pm 50$  nu)  
166 is located an intra-hominins (Es, Ice, Lo) mutation (**Figure 2B**, low left). The next, PS-  
167 affecting, ROI of rs96501 displays an intricate path of T-allele evolution (associated with a  
168 higher PS score) being anciently conserved from mice to primates but later substituted on the  
169 less efficient (in terms of the generated IQ scores) C allele in Neanderthals, later again  
170 replaced by the T allele in Mesolithic hunters and coming back during the Neolithic times  
171 (**Figure 2D**). The first *NTNG2* SNP rs1105684 is located at the beginning of the gene and  
172 affects WM in healthy human subjects (**Figure 3A**). The origin of the T-allele is evolutionary  
173 bound to marmoset since its position in mice is occupied by another pyrimidine base C  
174 (**Figure 3D**). Next on the gene are two SNP alleles for rs7851893 and rs3824574 which do  
175 not affect IQ and similarly to rs1105684 are surrounded by highly conserved ROIs not only  
176 in hominins and chimpanzee (100% identity) but also in marmoset (except 1 mutation for  
177 rs7851893). rs2149171 ROI (affecting the WM and PO scores) similarly to rs3824574 is  
178 100% conserved across the all species (including the mouse) except the allele itself. The  
179 attenuating IQ C-allele position is occupied in mice genome by T but present in Iceman and  
180 Eskimos genes. A distinct evolutionary path is taken by another cognitive endophenotype-



181 associated and affecting WM and PO scores A-allele of rs2274855 and its ROI (**Figure 3D**).  
182 Its position in mice is likely to be occupied by the C pyrimidine base (the software places a  
183 blank instead of it) which is gradually substituted on purine G in chimpanzee and misplaced  
184 by the lower IQ score-associated A-allele in Mesolithic hominins. And 20 nu downstream of  
185 the centre of ROI is located a modern human-specific point mutation translated into the  
186 T346A protein substitution (as described below).

187         The distinct picture of evolutionary changes among the *NTNG1* and *NTNG2* nested  
188 SNPs has prompted us to compare evolutionary rates for the full-length proteins encoded by  
189 these gene paralogs, Netrin-G1 and Netrin-G2, respectively (**Nakashiba et al., 2000 and**  
190 **2002**). Netrin-G1 undergoes only few changes in its amino acid (aa) composition with the  
191 maximum calculated rate of evolution reaching 0.05 when mice and marmoset proteins are  
192 compared, 0.01 among the primates, and 0.03 between chimpanzee and human due to a  
193 single point mutation A81S (**Figure 2E** and **SM: Netrin-G1**), absent in other primates.  
194 Netrin-G2 evolves 2.8 times faster between mouse and marmoset than its paralog Netrin-G1  
195 and continues evolving with a steady rate of 0.05 from primates to human (**Figure 3E** and  
196 **SM: Netrin-G2**). We have also reconstructed both proteins from ancient (Neanderthals,  
197 Paleolithic time) and extinct hominins (Mesolithic and Neolithic times) and compared them  
198 with primates' and mice' Netrin-G orthologs (**Figure 2F** and **3F**). Netrin-G1 is a highly  
199 conserved protein among the primates and hominins (**Figure 3F**). As for Netrin-G2, a  
200 mutation shared among the Neanderthals' and Mesolithic genomes, primates and mice  
201 (T346A) is absent in the Neolithic Iceman and modern human (the signal for Motala3,  
202 Motala1 and MezmayaskayaNea is not clear due to low sequence coverage). Primates  
203 (marmoset and chimpanzee) share another mutation (S371A/V) preserved in mouse and  
204 absent in hominins (further details can be found in the **SM: Results**).

205

205 DISCUSSION

206 ***NTNG* paralog SNPs and associated cognitive endophenotypes of human subjects.**

207 Shortcomings of cognitive and information processing are key features of SCZ diagnosis  
208 (APA, 2013). They are manifested as impairments in PO, WM, VC and PS (see Yoon et al.,  
209 2014 for references) frequently reported as attenuated scores upon IQ tests implementation.  
210 SCZ patients carrying a mutation allele for one of *NTNG* gene paralog SNPs form cognitive  
211 endophenotypes affecting the IQ scores (Figure 1C). The given endophenotypic groups  
212 comprise from subjects with either affected VIQ (via attenuated VC by *NTNG1* rs2218404 or  
213 WM by *NTNG2* rs2149171 and rs2274855) or affected PIQ (via attenuated PO by *NTNG2*  
214 rs2149171 and rs2274855). In two extra cases PS is affected by rs96501 of *NTNG1* and WM  
215 by rs1105684 of *NTNG2* (Figure 1B-1 and B-2, respectively) but in healthy human subjects.  
216 Such intriguing non-overlapping effect on the IQ domains prompts us to conclude that *NTNG*  
217 paralogs complement each other function and represent an example of how a synapse-  
218 expressed genes affect the human cognitive abilities, perhaps through the precision of  
219 neuronal connectivity perturbations and concomitant miswirings. The observed phenomena  
220 of the affected WM is the most striking due to its multifaceted constructive nature (Frydecka  
221 et al., 2014) underlying many, if not all, cognitive tasks such as comprehension, reasoning  
222 and learning (Baddeley, 1992) and historically introduced by Baddeley as the reading span  
223 test (Mackintosh, 2011). Lack of the localization effect of *NTNG2* SNP mutation alleles, all  
224 three are located in different parts of the gene (Figure 1A-2) but associated with identical  
225 endophenotype (Figure 1B-2), points to a uniform nature of the *NTNG2* function distribution  
226 over the entire gene. An obviously non-coding nature of all five IQ-affecting alleles  
227 (rs2149171 despite being exon 4-located encodes a silent F246F mutation) corroborates an  
228 idea that anthropoid trait-associated loci lie outside coding protein areas (del Rosario et al.,  
229 2014; Kellis et al., 2014) and hints towards a potential of these alleles to perturb genes

230 regulatory functions, e.g. mRNA splicing, affecting downstream located pivotally functional  
231 *NTNG* elements such as Ukd-domain encoding exons 6 and 7 or a unique Netrin-Gs trait –  
232 GPI-link. Alternatively, or simultaneously, the *NTNG* SNP alleles may be embedded into an  
233 epistatic network of other genes influencing human cognitive traits (**Hemani et al., 2014**).  
234 However since it is usual for a SNP effect to be estimated using an additive model (assuming  
235 either independent and cumulative single contribution) to the mean of a trait with the small  
236 effect size the power to detect the epistatic environment drastically declines. Contrary to the  
237 genetic associations with gene expression having large effect sizes (**Hemani et al., 2014**),  
238 cognitive trait-associated effect sizes are reportedly small (**Plomin and Deary, 2015**), e.g.  
239 the largest effect sizes of the variance of intelligence scores accounted for only 0.2%  
240 (**Benyamin et al., 2014**), 0.5% on GWA studies of 1,583 adolescence (**Desrivieres et al.,**  
241 **2015**) or was predicted to be ~1% on 3,511 adults (**Davies et al., 2011**). Another GWAS of  
242 educational attainment (sharing a moderate correlate with intelligence), which included  
243 126,559 individuals, reports on just 1% of the variance but only 0.02% in a replication  
244 sample (**Rietveld et al., 2013**). Our data support the preexisted conclusion that human  
245 cognitive traits modalities are not described by statistically large effect sizes.

246 **Evolutionary elaborations of the embedding IQ-affecting mutations loci.** Eleven  
247 previously published SCZ-associated SNPs were tested for their effect on IQ performance of  
248 human subjects and 5 of them were found to be associated with attenuated IQ cognitive  
249 endophenotypes (**Figure 1B-1 and B-2**). ROIs of 3 of them (rs2218404, rs1373336 and  
250 rs2274855) underwent an AE from chimpanzee to human when compared to New World  
251 monkeys to apes (marmoset-chimpanzee) path (**Figure 2C and 3C**). Two of them affect IQ in  
252 humans (rs2218404 – VC and rs2274855 – WM, **Figure 1B-1 and B-2**) while being located  
253 within the vicinity of exon 5 (2,275 nu downstream and 15 nu upstream, respectively) – a  
254 part of the lowest percent identity coding DNA among the *NTNG* gene paralogs (**Prosselkov**

255 **et al., 2015**). Presence of the evolutionary accelerated regions within the *NTNG* genes non-  
256 coding areas underscores them as contributors to the human-specific traits along with other  
257 genes (**Prabhakar et al., 2006**). However, not only ROIs of the IQ-affecting alleles but the  
258 alleles themselves demonstrate several unique evolutionary features (see **SM**: Discussion).  
259 To understand evolutionary forces driving the emergence of cognitive endophenotype-  
260 associated alleles we have deduced a set of rules outlined as follows. 1. An alternative  
261 (mutated) allele evolutionary appearance coincides with the lack of any other mutations  
262 within ROI (a conserved island rule); 2. positioning of the future mutation often represents a  
263 turning point of dramatic changes of an allele ROI (e.g. as seen in marmoset: rs2218404 (50-  
264 90%), rs628117 (30-80%), rs96501 (100-40%)); 3. an AE of ROI often precedes the  
265 emergence of a mutation allele (e.g. rs2218404: chimpanzee to human ( $k = 1.59$ ), appearance  
266 of “G” in Loschbour; rs628117: marmoset to chimpanzee ( $k = 1.10$ ), appearance of “T” in  
267 AltaiNea; rs96501: marmoset to chimpanzee ( $k = 0.83$ ), appearance of “C” in AltaiNea;  
268 rs2274855: chimpanzee to human ( $k = 0.79$ ), appearance of “A” in Motala12; 4. low identity  
269 percent (equivalent to subsequent substantial evolutionary changes) among the evolutionary  
270 species within the allele surrounding proximity of as long as  $\pm 50$  nu is not sufficient for the  
271 future mutated allele significance as a cognitive endophenotype determinant (as deduced by  
272 the IQ score) as seen for the rs1373336, rs1444042, rs4915045 and rs7851893 (none of them  
273 are IQ-affecting, though associated with SCZ, despite showing (very) low identity in mice).  
274 Rather some dramatic changes within the allele’s immediate proximity of  $\pm 10$  nu (defined as  
275 a ROI) preceded or followed by more stringently conserved DNA are necessary (the  
276 conserved island perturbation rule). Currently we are unable to state that the IQ-associated  
277 alleles ROIs are regulatory loci and an important source of evolutionary innovation  
278 (**Rubinstein and de Souza, 2013**) but they may be the smallest functional blocks of a strong  
279 positive selection exerts its action upon similarly to the 20–30 nu clusters of strongly

280 conserved non-coding elements (CNEs), transcription factor binding sites (TFBS), RNA  
281 splicing and editing motifs (**Harmston et al., 2013**).

282 **Extinct hominins and IQ-associated mutation alleles.** Availability of archaic genomes  
283 allows excavation for the advantageous alleles that modern humans acquired from archaic  
284 extinct hominins such as Neandertals and Denisovans who used to live 230,000-30,000 years  
285 ago (Middle/Upper Paleolithic, Old Stone Age) defined by distinct morphological features  
286 (**Meyer et al., 2012**), and from modern extinct humans (hunters, farmers) from Mesolithic  
287 (Middle Stone Age, ~10,000 yrs BC, **Lazaridis et al., 2014**) and Neolithic (New Stone Age,  
288 ~5,000 BC, **Keller et al., 2012; Rasmussen et al., 2010**) periods. Though exhibiting several  
289 anatomical features, making archaic hominins different from the modern human, there are  
290 studies challenging the idea that reserve symbolism and abstract thinking was an exclusive  
291 prerogative of modern human (**Appenzeller, 2013; Wong, 2015**). The time Neanderthals  
292 used to live in is thought to be associated with the onset of cognitive fluidity involving the  
293 capacity to draw analogies (early paintings), to combine concepts (making tools) and to adapt  
294 ideas for new contexts (**Gabora and Russon, 2011**). Wynn and Coolidge believe that  
295 evolution of WM was central to the evolution of human cognitive traits consisted from few  
296 genetic mutations that led to “enhanced WM” 200,000-40,000 BC (**Balter, 2010**). Our work  
297 partially supports this idea showing the perseverance of higher WM score-associated alleles  
298 across the hominins such as T of rs1105684 and G of rs2274855 (**Figure 3D**) but a Neolithic  
299 appearance of rs2149171 T in Iceman previously found only in mice genome supporting the  
300 conclusion made by **Crabtree (2013)** that modern humans as species “are surprisingly  
301 intellectually fragile and perhaps reached a peak 2,000–6,000 years ago”. Mesolithic period  
302 has been always considered as a key gate for the evolution of human languages (**Haak et al.,**  
303 **2015**) with our data showing that rs2218404 G-allele associated with a higher VC score  
304 (**Figure 1B-1**) emerges for the first time in the Loschbour hunter *NTNG1* gene (**Figure 3D**).

305 VC as a part of abstract symbol usage is associated with the global network efficiency (as a  
306 part of fronto-parietal network in **Song et al., 2008**; **Glascher et al., 2009**), and global  
307 communication and intellectual performance (**Pamplona et al., 2015**). From this point of  
308 view it is not surprising that appearance of the G allele in Loschbour and Iceman genomes  
309 coincides with the presence of PS enhancing rs96501 T allele (**Figure 3D**). A wealth of data  
310 has been collected characterising possible look and health status of archaic hominins and  
311 modern but extinct humans (for ref. see **Sarkissian et al., 2015** and **SM: Discussion**). Based  
312 on our own data we may also speculate that the extinct hominins may have had a lower VC  
313 comparing to us, and consequently, Neanderthals were unlikely able for a semantic  
314 communication due to a global network inefficiency VC is associated with; they have had  
315 similar to us PS (if they had lived beyond the Mesolithic period), and were likely to have had  
316 identical to modern human WM, corroborating the advanced evolutionary nature of this  
317 important human cognitive domain of a limited capacity and associated with intelligence.

318

## 319 CONCLUSION

320 Evolution of a novel function relies on enhanced genetic robustness through functional  
321 redundancy potentially provided by a gene duplication event. Further evolutionary outcome  
322 depends on the substrate availability (undergoing its own evolution) upon which the novel  
323 function(s) exerts its action. Nature does not create but tinkers to perfection provided to it  
324 material exploring available evolutionary tools. Half a billion years ago a gene duplication  
325 event had provided a plethora of such substrate thus converting the evolution itself into a  
326 “Creator” of new functions. Here we have described how a pair of twin genes got themselves  
327 involved into the human cognitive functioning believed to be emerged in a primordial state in  
328 primitive vertebrates prior to the first recorded gene duplication. Subsequent process of the  
329 function specialisation made *NTNG* paralogs to subfunctionalise into distinct cognitive

330 domains in a complementary manner (**Prosselkov et al., 2015**).

331

331 MATERIALS AND METHODS

332 **Ethics statement.** This study was performed in accordance with the World Medical  
333 Association's Declaration of Helsinki and approved by the Osaka University Research Ethics  
334 Committee. A written informed consent was obtained from all subjects after the procedures  
335 had been fully explained.

336 **Subjects.** The procedures were performed as per established protocols at Osaka University as  
337 described previously (**Ohi et al., 2012**). The subjects consisted from 339 patients with SCZ  
338 and 716 healthy controls. The sex ratio did not differ significantly between the groups, but  
339 the mean age was significantly different. The subjects were all biologically unrelated  
340 Japanese and recruited from both outpatient and inpatient units at Osaka University Hospital  
341 and other psychiatric hospitals. Each patient with SCZ had been diagnosed by at least two  
342 trained psychiatrists based on unstructured clinical interviews, according to the criteria of the  
343 DSM-IV (**APA, 2013**). In case if the diagnosis of the two trained psychiatrists was discordant,  
344 it was resolved through the further negotiations on both specialist opinions. In case of  
345 unresolved diagnostic disputes, the patient was omitted from the study. Psychiatrically  
346 healthy controls were recruited through local advertisements and were evaluated by means of  
347 unstructured interviews to exclude individuals with current or past contact with psychiatric  
348 services, those who experienced psychiatric medications, or who were not Japanese. Controls  
349 for family history of a CD, such as SCZ, BD, or major depressive disorder were not included.  
350 Ethnicity was determined by self-report and was not confirmed by genetic analyses.  
351 Additionally, subjects were excluded from this study if they had neurologic or medical  
352 conditions that could have potentially affect their central nervous system, such as atypical  
353 headaches, head trauma with loss of consciousness, chronic lung disease, kidney disease,  
354 chronic hepatic disease, thyroid disease, active cancer, cerebrovascular disease, epilepsy,  
355 seizures, substance abuse related disorders, or mental retardation.



356 **SNPs selection, genotyping, and genomic sequencing.** This study was designed to examine  
357 the association of SCZ patients cognitive performance (through WAIS-III implementation,  
358 **Wechsler, 1958**) with *NTNG* genes. Venous blood was collected from the subjects. Genomic  
359 DNA was extracted from the whole blood using standard procedures. The SNPs (**Fukasawa**  
360 **et al., 2004; Aoki-Suzuki et al., 2005; JSSLG et al., 2005; Eastwood and Harrison, 2008;**  
361 **Ohtsuki et al., 2008; Zakharyan et al., 2011; Zhu et al., 2011; Ayalew et al., 2012; Wilcox**  
362 **and Quadri, 2014**) were genotyped using the TaqMan allelic discrimination assay (Applied  
363 Biosystems, Foster City, CA). No deviations from the Hardy-Weinberg equilibrium in the  
364 examined SNPs were detected ( $p > 0.05$ ).

365 **Statistical analysis.** The effects of the diagnosis, genotype and their interaction on cognitive  
366 performances in the WAIS were analyzed by two-way analyses of covariance (ANCOVA).  
367 Diagnosis and genotype statuses were included in the model as independent variables (**ST1**).  
368 FIQ and each WAIS subscale score (VIQ, PIQ, VC, PO, WM, PS, Vc, SiM, IF, CH, AM, DS,  
369 LNS, PC, BD, and MR) were included as dependent variables. Sex, age and years of  
370 education were treated as covariates, as they were possible confounding factors. All  $p$  values  
371 are two tailed, and statistical significance was defined as  $*p < 0.05$  and  $**p < 0.01$ .

372 **Identity percent calculations and the definition of ROIs.** The complete procedure is  
373 described in the **Figure 4** legend. Stretcher (**McWilliam et al., 2013**) was used for the  
374 alignments (the default values were: gap penalty – 16 (DNA) and 12 (protein), and the extend  
375 penalty – 4 (DNA) and 2 (protein)), for the percent identity calculations and evolutionary  
376 rates. A ROI was selected as a minimal area surrounding a SNP mutation allele incorporating  
377 the outmost evolutionary dramatic changes.

378 **Mice, primates and hominins *NTNG* paralogs DNA and encoded aa sequences**  
379 **reconstruction.** Genomes for mouse (GRC38.p3) and marmoset (C\_jacchus3.2.1) were from  
380 Ensemble. Since chimpanzee's genome is based only on a single individual (CHIMP2.1.4,

381 Clint) and contains several questionable information we have reconstructed a consensus  
382 genome sequence for both *NTNG* genes based on 25 primate sequences of *Pan troglodytes*  
383 (**Prado-Martinez et al., 2013**). All datasets used for the *NTNG* paralogs DNA and encoded  
384 by them proteins reconstruction are listed in **ST2**. For details refer to **SM**.

385

#### 386 SUPPLEMENTARY MATERIALS (**SM**)

387 Contain additional Results and Discussion, Supplementary Methods (ancient and primate  
388 genomes reconstructions), and Supplementary Tables (**ST1** and **ST2**) as a single compiled  
389 pdf file. Also included are human Netrin-G1 and Netrin-G2 alignments, as well as 101 nu  
390 alignments for all 11 ROIs across the all analysed species.

391

#### 392 ACKNOWLEDGEMENTS

393 Authors would like to acknowledge the financial support provided by Funding Program for  
394 World-Leading Innovative R&D on Science and Technology (FIRST Programme) and  
395 KAKENHI 15H04290 by the Japan Society for the Promotion of Science (JSPS).

396

#### 397 COMPETING INTERESTS

398 Authors would like to express a lack of any competing interests associated with the work.

399 REFERENCES

- 400 **Abitua PB**, Wagner E, Navarrete IA, Levine M. 2012. Identification of a rudimentary neural  
401 crest in a non-vertebrate chordate. *Nature* **492**:104-107. doi: [10.1038/nature11589](https://doi.org/10.1038/nature11589).
- 402 **Abitua PB**, Gainous TB, Kaczmarczyk AN, Winchell CJ, Hudson C, Kamata K, Nakagawa  
403 M, Tsuda M, Kusakabe, TG, Levine M. 2015. The pre-vertebrate origins of neurogenic  
404 placodes. *Nature* **524**:462-465. doi: [10.1038/nature14657](https://doi.org/10.1038/nature14657).
- 405 **Aoki-Suzuki M**, Yamada K, Meerabux J, Iwayama-Shigeno Y, Ohba H, Iwamoto K, Takao  
406 H, Toyota T, Suto Y, Nakatani N, Dean B, Nishimura S, Seki K, Kato T, Itohara S,  
407 Nishikawa T, Yoshikawa, T. 2005. A Family-Based Association Study and Gene  
408 Expression Analyses of Netrin-G1 and -G2 Genes in Schizophrenia. *Biological Psychiatry*  
409 **57**:382–393. doi: [10.1016/j.biopsych.2004.11.022](https://doi.org/10.1016/j.biopsych.2004.11.022).
- 410 **APA** (American Psychiatric Association). 2013. Diagnostic and Statistical Manual of Mental  
411 Disorders (DSM-V<sup>®</sup>), Fifth Edition. 991 pp. doi: [10.1176/appi.books.9780890425596](https://doi.org/10.1176/appi.books.9780890425596).
- 412 **Appenzeller T**. 2013. Old masters. *Nature* **497**: 302-304.
- 413 **Ayalew M**, Le-Niculescu H, Levey DF, Jain N, Changala B, Patel SD, Winiger E, Breier A,  
414 Shekhar A, Amdur R, Koller D, Nurnberger JI, Corvin A, Geyer M, Tsuang MT, Salomon  
415 D, Schork NJ, Fanous AH, O'Donovan MC, Niculescu AB. 2012. Convergent functional  
416 genomics of schizophrenia: from comprehensive understanding to genetic risk prediction.  
417 *Molecular Psychiatry* **17**:887-905. doi: [10.1038/mp.2012.37](https://doi.org/10.1038/mp.2012.37).
- 418 **Baddeley A**. 1992. Working memory. *Science* **255**:556-559. doi: [10.1126/science.1736359](https://doi.org/10.1126/science.1736359).
- 419 **Balter M**. 2010. Did Working Memory Spark Creative Culture? *Science* **328**:160-163. doi:  
420 [10.1126/science.328.5975.160](https://doi.org/10.1126/science.328.5975.160).
- 421 **Barnett JH**, Robbins TW, Leeson VC, Sahakian BJ, Joyce EM, Blackwell AD. 2010.  
422 Assessing cognitive function in clinical trials of schizophrenia. *Neuroscience and*  
423 *Biobehavioral Reviews* **34**:1161-1177. doi: [10.1016/j.neubiorev.2010.01.012](https://doi.org/10.1016/j.neubiorev.2010.01.012).

- 424 **Belmonte JCI**, Callaway EM, Churchland P, Caddick SJ, Feng G, Homanics GE, Lee K-F,  
425 Leopold DA, Miller CT, Mitchell JF, Mitalipov S, Moutri AR, Movshon JA, Okano H,  
426 Reynolds JH, Ringach D, Sejnowski TJ, Silva AC, Strick PL, Wu J, Zhang F. 2015.  
427 Brains, Genes, and Primates. *Neuron* **86**:617-631. doi: [10.1016/j.neuron.2015.03.021](https://doi.org/10.1016/j.neuron.2015.03.021).
- 428 **Benyamin B**, Pourcain BSt, Davis OS, Davies G, Hansell NK, Brion M-JA, Kirkpatrick RM,  
429 Cents RAM, Franic S, Miller MB, Haworth CMA, Meaburn E, Price TS, Evans DM,  
430 Timpson N, Kemp J, Ring S, McArdle W, Medland SE, Yang J, Harris SE, Liewald DC,  
431 Scheet P, Xiao X, Hudziak JJ, de Geus EJC, Wellcome Trust Case Control Consortium 2  
432 (WTCCC2), Jaddoe VWV, Starr JM, Verhulst FC, Pennell C, Tiemeier H, Iacono WG,  
433 Palmer LJ, Montgomery GW, Martin NG, Boomsma DI, Posthuma D, McGue M, Wright  
434 MJ, Davey Smith G, Deary IJ, Plomin R, Visscher PM. 2014. Childhood intelligence is  
435 heritable, highly polygenic and associated with *FNBP1L*. *Molecular Psychiatry* **19**:253-  
436 258. doi: [10.1038/mp.2012.184](https://doi.org/10.1038/mp.2012.184).
- 437 **Crabtree GR**. 2013. Our fragile intellect. Part I. *Trends in Genetics* **29**:1-3. doi:  
438 [10.1016/j.tig.2012.10.002](https://doi.org/10.1016/j.tig.2012.10.002).
- 439 **Davies G**, Tenesa A, Payton A, Yang J, Harris SE, Liewald D, Ke X, Hellard SLe,  
440 Christoforou A, Luciano M, McGhee K, Lopez L, Gow AJ, Corley J, Redmond P, Fox HC,  
441 Haggarty P, Whalley LJ, McNeill G, Goddard ME, Espeseth T, Lundervold AJ, Reinvang  
442 I, Pickles A, Steen VM, Ollier W, Porteous DJ, Horan M, Starr JM, Pendleton N, Visscher  
443 PM, Deary IJ. 2011. Genome-wide association studies establish that human intelligence is  
444 highly heritable and polygenic. *Molecular Psychiatry* **16**:996-1005. doi:  
445 [10.1038/mp.2011.85](https://doi.org/10.1038/mp.2011.85).
- 446 **Deary IJ**, Spinath FM, Bates TC. 2006. Genetics of intelligence. *European Journal of*  
447 *Human Genetics* **14**:690-700. doi: [10.1038/sj.ejhg.5201588](https://doi.org/10.1038/sj.ejhg.5201588).
- 448 **del Rosario RCH**, Rayan NA, Prabhakar S. 2014. Noncoding Origins of Anthropoid Traits

- 449 and a New Null Model of Transposon Functionalization. *Genome Research* **24**:1469-1484.  
450 [doi: 10.1101/gr.168963.113](https://doi.org/10.1101/gr.168963.113).
- 451 **Eastwood SL**, Harrison PJ. 2008. Decreased mRNA expression of netrin-G1 and netrin-G2  
452 in the temporal lobe in schizophrenia and bipolar disorder. *Neuropsychopharmacology*  
453 **33**:933-945. [doi: 10.1038/sj.npp.1301457](https://doi.org/10.1038/sj.npp.1301457).
- 454 **Forbes NF**, Carrick LA, McIntosh AM, Lawrie SM. 2009. Working memory in  
455 schizophrenia: a meta-analysis. *Psychological Medicine* **39**:889-905. [doi:](https://doi.org/10.1017/s0033291708004558)  
456 [10.1017/s0033291708004558](https://doi.org/10.1017/s0033291708004558).
- 457 **Frydecka D**, Eissa AM, Hewedi DH, Ali M, Drapała J, Misiak B, Kłosińska E, Phillips JR,  
458 Moustafa AA. 2014. Impairments of working memory in schizophrenia and bipolar  
459 disorder: the effect of history of psychotic symptoms and different aspects of cognitive  
460 task demands. *Frontiers in Behavioral Neuroscience* **8**:A416. [doi:](https://doi.org/10.3389/fnbeh.2014.00416)  
461 [10.3389/fnbeh.2014.00416](https://doi.org/10.3389/fnbeh.2014.00416).
- 462 **Fukasawa M**, Aoki M, Yamada K, Iwayama-Shigeno Y, Takao H, Meerabux J, Toyota T,  
463 Nishikawa T, Yoshikawa T. 2004. Case-control association study of human netrin G1  
464 gene in Japanese schizophrenia. *Journal of Medical and Dental Sciences* **51**: 121-128.
- 465 **Gabora L and Russon A**. 2011. "The evolution of Intelligence". In "The Cambridge  
466 Handbook of Intelligence". Edited by Sternberg RJ, Kaufman SB. p. 328-350.
- 467 **Geschwind DH and Rakic P**. 2013. Cortical Evolution: Judge the Brain by Its Cover.  
468 *Neuron* **80**:633-647. [doi: 10.1016/j.neuron.2013.10.045](https://doi.org/10.1016/j.neuron.2013.10.045).
- 469 **Glascher J**, Tranel D, Paul LK, Rudrauf D, Rorden C, Hornaday A, Grabowski T, Damasio  
470 H, Adolphs R. 2009. Lesion Mapping of Cognitive Abilities Linked to Intelligence.  
471 *Neuron* **61**:681-691. [doi: 10.1016/j.neuron.2009.01.026](https://doi.org/10.1016/j.neuron.2009.01.026).
- 472 **Green RE**, Krause J, Briggs AW, Maricic T, Stenzel U, Kircher M, Patterson N, Li H, Zhai  
473 W, Fritz MH-Y, Hansen NF, Durand EY, Malaspinas A-S, Jensen JD, Marques-Bonet T,

- 474 Alkan C, Prüfer K, Meyer M, Burbano HA, Good JM, Schultz R, Aximu-Petri A, Butthof  
475 A, Höber B, Höffner B, Siegemund M, Weihmann A, Nusbaum C, Lander ES, Russ C,  
476 Novod N, Affourtit J, Egholm M, Verna C, Rudan P, Brajkovic D, Kucan Ž, Gušić I,  
477 Doronichev VB, Golovanova LV, Lalueza-Fox C, de la Rasilla M, Fortea J, Rosas A,  
478 Schmitz RW, Johnson PLF, Eichler EE, Falush D, Birney E, Mullikin JC, Slatkin M,  
479 Nielsen R, Kelso J, Lachmann M, Reich D, Pääbo S. 2010. A Draft Sequence of the  
480 Neandertal Genome. *Science* **328**:710-722. doi: [10.1126/science.1188021](https://doi.org/10.1126/science.1188021).
- 481 **Haak W**, Lazardis I, Patterson N, Rohland N, Mallick S, Llamas B, Brandt G, Nordenfelt S,  
482 Harney E, Stewardson K, Fu Q, Mittnik A, Bánffy E, Economou C, Francken M,  
483 Friederich S, Pena RG, Hallgren F, Khartanovich V, Khokhlov A, Kunst M, Kuznetsov P,  
484 Meller H, Mochalov O, Moiseyev V, Nicklisch N, Pichler SL, Risch R, Guerra MAR,  
485 Roth C, Szécsényi-Nagy A, Wahl J, Meyer M, Krause J, Brown D, Anthony D, Cooper A,  
486 Alt KW, Reich D. 2015. Massive migration from the steppe was a source for Indo-  
487 European languages in Europe. *Nature* **522**:207-211. doi: [10.1038/nature14317](https://doi.org/10.1038/nature14317).
- 488 **Hampshire A**, Highfield RR, Parkin BL, Owen AM. 2012. Fractionating Human Intelligence.  
489 *Neuron* **76**:1225-1237. doi: [10.1016/j.neuron.2012.06.022](https://doi.org/10.1016/j.neuron.2012.06.022).
- 490 **Harmston N**, Baresic A, Lenhard B. 2013. The mystery of extreme non-coding conservation.  
491 *Philosophical Transactions of the Royal Society B-Biological Sciences* **368**:A20130021.  
492 doi: [10.1098/rstb.2013.0021](https://doi.org/10.1098/rstb.2013.0021).
- 493 **Hemani G**, Shakhbazov K, Westra H-J, Esko T, Henders AK, McRae AF, Yang J, Gibson G,  
494 Martin NG, Metspalu A, Franke L, Montgomery GW, Visscher PM, Powell JE. 2014.  
495 Detection and replication of epistasis influencing transcription in humans. *Nature*  
496 **508**:249–253. doi: [10.1038/nature13005](https://doi.org/10.1038/nature13005).
- 497 **Joshi PK**, Esko T, Mattsson H, Eklund N, Gandin I, Nutile T, Jackson AU, Schurmann C,  
498 Smith AV, Zhang W, Okada Y, Stančáková A, Faul JD, Zhao W, Bartz TM, Concas MP,

499 Franceschini N, Enroth S, Vitart V, Trompet S, Guo X, Chasman DI, O'Connell JR, Corre  
500 T, Nongmaithem SS, Chen Y, Mangino M, Ruggiero D, Traglia M, Farmaki A-E,  
501 Kacprowski T, Bjornes A, van der Spek A, Wu Y, Giri AK, Yanek LR, Wang L, Hofer E,  
502 Rietveld CA, McLeod O, Cornelis MC, Pattaro C, Verweij N, Baumbach C, Abdellaoui A,  
503 Warren HR, Vuckovic D, Mei H, Bouchard C, Perry JRB, Cappellani S, Mirza SS, Benton  
504 MC, Broeckel U, Medland SE, Lind PA, Malerba G, Drong A, Yengo L, Bielak LF, Zhi D,  
505 van der Most PJ, Shriner D, Maegi R, Hemani G, Karaderi T, Wang Z, Liu T, Demuth I,  
506 Zhao JH, Meng W, Lataniotis L, van der Laan SW, Bradfield JP, Wood AR, Bonnefond  
507 A, Ahluwalia TS, Hall LM, Salvi E, Yazar S, Carstensen L, de Haan HG, Abney M, Afzal  
508 U, Allison MA, Amin N, Asselbergs FW, Bakker SJL, Barr RG, Baumeister SE, Benjamin  
509 DJ, Bergmann S, Boerwinkle E, Bottinger EP, Campbell A, Chakravarti A, Chan Y,  
510 Chanock SJ, Chen C, Chen Y-DI, Collins FS, Connell J, Correa A, Cupples LA, Smith  
511 GD, Davies G, Dörr M, Ehret G, Ellis SB, Feenstra B, Feitosa MF, Ford I, Fox CS,  
512 Frayling TM, Friedrich N, Geller F, Generation Scotland, Gillham-Naseny I, Gottesman  
513 O, Graff M, Grodstein F, Gu C, Haley C, Hammond CJ, Harris SE, Harris TB, Hastie ND,  
514 Heard-Costa NL, Heikkilä K, Hocking LJ, Homuth G, Hottenga J-J, Huang J, Huffman JE,  
515 Hysi PG, Ikram MA, Ingelsson E, Joensuu A, Johansson Å, Jousilahti P, Jukema JW,  
516 Kähönen M, Kamatani Y, Kanoni S, Kerr SM, Khan NM, Koellinger P, Koistinen HA,  
517 Kooner MK, Kubo M, Kuusisto J, Lahti J, Launer LJ, Lea RA, Lehne B, Lehtimäki T,  
518 Liewald DCM, Lind L, Loh M, Lokki M-L, London SJ, Loomis SJ, Loukola A, Lu Y,  
519 Lumley T, Lundqvist A, Männistö S, Marques-Vidal P, Masciullo C, Matchan A, Mathias  
520 RA, Matsuda K, Meigs JB, Meisinger C, Meitinger T, Menni C, Mentch FD, Mihailov E,  
521 Milani L, Montasser ME, Montgomery GW, Morrison A, Myers RH, Nadukuru R,  
522 Navarro P, Nelis M, Nieminen MS, Nolte IM, O'Connor GT, Ogunniyi A, Padmanabhan S,  
523 Palmas WR, Pankow JS, Patarcic I, Pavani F, Peyser PA, Pietilainen K, Poulter N,



524 Prokopenko I, Ralhan S, Redmond P, Rich SS, Rissanen H, Robino A, Rose LM, Rose R,  
525 Sala C, Salako B, Salomaa V, Sarin A-P, Saxena R, Schmidt H, Scott LJ, Scott WR,  
526 Sennblad B, Seshadri S, Sever P, Shrestha S, Smith BH, Smith JA, Soranzo N,  
527 Sotoodehnia N, Southam L, Stanton AV, Stathopoulou MG, Strauch K, Strawbridge RJ,  
528 Suderman MJ, Tandon N, Tang S-T, Taylor KD, Tayo BO, Töglhofer AM, Tomaszewski  
529 M, Tšernikova N, Tuomilehto J, Uitterlinden AG, Vaidya D, van Hylckama Vlieg A, van  
530 Setten J, Vasankari T, Vedantam S, Vlachopoulou E, Vozzi D, Vuoksimaa E,  
531 Waldenberger M, Ware EB, Wentworth-Shields W, Whitfield JB, Wild S, Willemsen G,  
532 Yajnik CS, Yao J, Zaza G, Zhu X, The BioBank Japan Project, Salem RM, Melbye M,  
533 Bisgaard H, Samani NJ, Cusi D, Mackey DA, Cooper RS, Froguel P, Pasterkamp G, Grant  
534 SFA, Hakonarson H, Ferrucci L, Scott RA, Morris AD, Palmer CAN, Dedoussis G,  
535 Deloukas P, Bertram L, Lindenberg U, Berndt SI, Lindgren CM, Timpson NJ, Toenjes  
536 A, Munroe PB, Sørensen TIA, Rotimi CN, Arnett DK, Oldehinkel AJ, Kardia SLR,  
537 Balkau B, Gambaro G, Morris AP, Eriksson JG, Wright MJ, Martin NG, Hunt SC, Starr  
538 JM, Deary IJ, Griffiths LR, Tiemeier H, Pirastu N, Kaprio J, Wareham NJ, Pérusse L,  
539 Wilson JG, Girotto G, Caulfield MJ, Raitakari O, Boomsma DI, Gieger C, van der Harst  
540 Pim, Hicks AA, Kraft P, Sinisalo J, Knekt P, Johannesson M, Magnusson PKE, Hamsten  
541 A, Schmidt R, Borecki IB, Vartiainen E, Becker DM, Bharadwaj D, Mohlke KL, Boehnke  
542 M, van Duijn CM, Sanghera DK, Teumer A, Zeggini E, Metspalu A, Gasparini P, Ulivi S,  
543 Ober C, Toniolo D, Rudan I, Porteous DJ, Ciullo M, Spector TD, Hayward C, Dupuis J,  
544 Loos RJJ, Wright AF, Chandak GR, Vollenweider P, Shuldiner AR, Ridker PM, Rotter JJ,  
545 Sattar N, Gyllenstein U, North KE, Pirastu M, Psaty BM, Weir DR, Laakso M, Gudnason  
546 V, Takahashi A, Chambers JC, Kooner JS, Strachan DP, Campbell H, Hirschhorn JN,  
547 Perola M, Polašek O, Wilson JF. 2015. Directional dominance on stature and cognition in  
548 diverse human populations. *Nature*. **523**:459-462. doi: [10.1038/nature14618](https://doi.org/10.1038/nature14618).



- 549 **Keller A**, Graefen A, Ball M, Matzas M, Boisguerin V, Maixner F, Leidinger P, Backes C,  
550 Khairat R, Forster M, Stade B, Franke A, Mayer J, Spangler J, McLaughlin S, Shah M,  
551 Lee C, Harkins TT, Sartori A, Moreno-Estrada A, Henn B, Sikora M, Semino O, Chiaroni  
552 J, Rootsi S, Myres NM, Cabrera VM, Underhill PA, Bustamante CD, Vigl EE, Samadelli  
553 M, Cipollini G, Haas J, Katus H, O'Connor BD, Carlson MRJ, Meder B, Blin N, Meese E,  
554 Pusch CM, Zink A. 2012. New insights into the Tyrolean Iceman's origin and phenotype  
555 as inferred by whole-genome sequencing. *Nature Communications* **3**:A698. doi:  
556 [10.1038/ncomms1701](https://doi.org/10.1038/ncomms1701).
- 557 **Kellis M**, Wold B, Snyder MP, Bernstein BE, Kundaje A, Marinov GK, Ward LD, Birney E,  
558 Crawford GE, Dekker J, Dunham I, Elnitski LL, Farnham PJ, Feingold EA, Gerstein M,  
559 Giddings MC, Gilbert DM, Gingeras TR, Green ED, Guigo R, Hubbard T, Kent J, Lieb JD,  
560 Myers RM, Pazin MJ, Ren B, Stamatoyannopoulos JA, Weng Z, White KP, Hardison RC.  
561 2014. Defining functional DNA elements in the human genome. *Proceedings of the*  
562 *National Academy of Sciences of the United States of America* **111**:6131-6138. doi:  
563 [10.1073/pnas.1318948111](https://doi.org/10.1073/pnas.1318948111).
- 564 **Klotzsch E and Schutz GJ**. 2013. A critical survey of methods to detect plasma membrane  
565 rafts. *Philosophical Transactions of the Royal Society B-Biological Sciences*  
566 **368**:20120033. doi: [10.1098/rstb.2012.0033](https://doi.org/10.1098/rstb.2012.0033).
- 567 **Lazaridis I**, Patterson N, Mittnik A, Renaud G, Mallick S, Kirsanow K, Sudmant PH,  
568 Schraiber JG, Castellano S, Lipson M, Berger B, Economou C, Bollongino R, Fu Q, Bos  
569 KI, Nordenfelt S, Li H, de Filippo C, Prüfer K, Sawyer S, Posth C, Haak W, Hallgren F,  
570 Fornander E, Rohland N, Delsate D, Francken M, Guinet J-M, Wahl J, Ayodo G, Babiker  
571 HA, Bailliet G, Balanovska E, Balanovsky O, Barrantes R, Bedoya G, Ben-Ami H, Bene J,  
572 Berrada F, Bravi CM, Brisighelli F, Busby GBJ, Cali F, Churnosov M, Cole David EC,  
573 Corach D, Damba L, van Driem G, Dryomov S, Dugoujon J-M, Fedorova SA, Romero IG,

574 Gubina M, Hammer M, Henn BM, Hervig T, Hodoglugil U, Jha AR, Karachanak-  
575 Yankova S, Khusainova R, Khusnutdinova E, Kittles R, Kivisild T, Klitz W, Kučinskas V,  
576 Kushniarevich A, Laredj L, Litvinov S, Loukidis T, Mahley RW, Melegh B, Metspalu E,  
577 Molina J, Mountain J, Näkkäläjärvi K, Nesheva D, Nyambo T, Osipova L, Parik J,  
578 Platonov F, Posukh O, Romano V, Rothhammer F, Rudan I, Ruizbakiev R, Sahakyan H,  
579 Sajantila A, Salas A, Starikovskaya EB, Tarekegn A, Toncheva D, Turdikulova S,  
580 Uktveryte I, Utevska O, Vasquez R, Villena M, Voevoda M, Winkler CA, Yepiskoposyan  
581 L, Zalloua P, Zemunik T, Cooper A, Capelli C, Thomas MG, Ruiz-Linares A, Tishkoff  
582 SA, Singh L, Thangaraj K, Villems R, Comas D, Sukernik R, Metspalu M, Meyer M,  
583 Eichler EE, Burger J, Slatkin M, Pääbo S, Kelso J, Reich D, Krause J. 2014. Ancient  
584 human genomes suggest three ancestral populations for present-day Europeans. *Nature*  
585 **513**:409-413. doi: [10.1038/nature13673](https://doi.org/10.1038/nature13673).

586 **Leeson VC**, Robbins TW, Matheson E, Hutton SB, Ron MA, Barnes TRE, Joyce EM. 2009.  
587 Discrimination Learning, Reversal, and Set-Shifting in First-Episode Schizophrenia:  
588 Stability Over Six Years and Specific Associations with Medication Type and  
589 Disorganization Syndrome. *Biological Psychiatry* **66**:586-593. doi:  
590 [10.1016/j.biopsych.2009.05.016](https://doi.org/10.1016/j.biopsych.2009.05.016).

591 **Lips ES**, Cornelisse LN, Toonen RF, Min JL, Hultman CM, the International Schizophrenia  
592 Consortium, Holmans PA, O'Donovan MC, Purcell SM, Smit AB, Verhage M, Sullivan  
593 PF, Visscher PM, Posthuma D. 2012. Functional gene group analysis identifies synaptic  
594 gene groups as risk factor for schizophrenia. *Molecular Psychiatry* **17**:996-1006. doi:  
595 [10.1038/mp.2012.37](https://doi.org/10.1038/mp.2012.37).

596 **Mackintosh NJ**. 2011. "History of theories and measurement of Intelligence". In "The  
597 Cambridge Handbook of Intelligence". Edited by Sternberg RJ, Kaufman SB. p. 3-19. doi:  
598 [10.1017/CBO9780511977244](https://doi.org/10.1017/CBO9780511977244).

- 599 **Matsukawa H**, Akiyoshi-Nishimura S, Zhang Q, Lujan R, Yamaguchi K, Goto H, Yaguchi  
600 K, Hashikawa T, Sano C, Shigemoto R, Nakashiba T, Itohara S. 2014. Netrin-G/NGL  
601 Complexes Encode Functional Synaptic Diversification. *Journal of Neuroscience*  
602 **34**:15779-15792. doi: [10.1523/jneurosci.1141-14.2014](https://doi.org/10.1523/jneurosci.1141-14.2014).
- 603 **McWilliam H**, Li W, Uludag M, Squizzato S, Park YM, Buso N, Cowley AP, Lopez R. 2013.  
604 Analysis Tool Web Services from the EMBL-EBI. *Nucleic Acids Research* **41**:597-600.  
605 doi: [10.1093/nar/gkt376](https://doi.org/10.1093/nar/gkt376).
- 606 **Meyer M**, Kircher M, Gansauge MT, Li H, Racimo F, Mallick S, Schraiber JG, Jay F, Prüfer  
607 K, de Filippo C, Sudmant PH, Alkan C, Fu QM, Do R, Rohland N, Tandon A, Siebauer M,  
608 Green RE, Bryc K, Briggs AW, Stenzel U, Dabney J, Shendure J, Kitzman J, Hammer MF,  
609 Shunkov MV, Derevianko AP, Patterson N, Andrés AM, Eichler EE, Slatkin M, Reich D,  
610 Kelso J, Pääbo S. 2012. A High-Coverage Genome Sequence from an Archaic Denisovan  
611 Individual. *Science* **338**:222-226. doi: [10.1126/science.1224344](https://doi.org/10.1126/science.1224344).
- 612 **Nakashiba T**, Ikeda T, Nishimura S, Tashiro K, Honjo T, Culotti JG, Itohara, S. 2000.  
613 Netrin-G1: a Novel Glycosyl Phosphatidylinositol-Linked Mammalian Netrin That Is  
614 Functionally Divergent from Classical Netrins. *The Journal of Neuroscience* **20**:6540-  
615 6550.
- 616 **Nakashiba T**, Nishimura S, Ikeda T, Itohara S. 2002. Complementary expression and neurite  
617 outgrowth activity of netrin-G subfamily members. *Mechanisms of Development* **111**:47-  
618 60. doi: [10.1016/S0925-4773\(01\)00600-1](https://doi.org/10.1016/S0925-4773(01)00600-1).
- 619 **Nishimura-Akiyoshi S**, Niimi K, Nakashiba T, and Itohara S. 2007. Axonal netrin-Gs  
620 transneuronally determine lamina-specific subdendritic segments. *Proceedings of the*  
621 *National Academy of Sciences of the United States of America* **104**:14801-14806. doi:  
622 [10.1073/pnas.0706919104](https://doi.org/10.1073/pnas.0706919104).
- 623 **Ohi K**, Hashimoto R, Nakazawa T, Okada T, Yasuda Y, Yamamori H, Fukumoto M,

- 624 Umeda-Yano S, Iwase M, Kazui H, Yamamoto T, Kano M, Takeda M. 2012. The  
625 p250GAP Gene Is Associated with Risk for Schizophrenia and Schizotypal Personality  
626 Traits. *PLoS One*:e35696. doi: [10.1371/journal.pone.0035696](https://doi.org/10.1371/journal.pone.0035696).
- 627 **Ohno S.** 1970. *Evolution by Gene Duplication*. Springer, New York.
- 628 **Ohtsuki T**, Horiuchi Y, Koga M, Ishiguro H, Inada T, Iwata N, Ozaki N, Ujike H, Watanabe  
629 Y, Someya T, Arinami T. 2008. Association of polymorphisms in the haplotype block  
630 spanning the alternatively spliced exons of the *NTNG1* gene at 1p13.3 with schizophrenia  
631 in Japanese populations. *Neuroscience Letters* **435**:194-197. doi:  
632 [10.1016/j.neulet.2008.02.053](https://doi.org/10.1016/j.neulet.2008.02.053).
- 633 **Pamplona GSP**, Neto GSS, Rosset SRE, Rogers BP, Salmon CEG. 2015. Analyzing the  
634 association between functional connectivity of the brain and intellectual performance.  
635 *Frontiers in Human Neuroscience* **9**:A61. doi: [10.3389/fnhum.2015.00061](https://doi.org/10.3389/fnhum.2015.00061).
- 636 **Plomin R and Deary IJ.** 2015. Genetics and intelligence differences: five special findings.  
637 *Molecular Psychiatry* **20**:98-108. doi: [10.1038/mp.2014.105](https://doi.org/10.1038/mp.2014.105).
- 638 **Prabhakar S**, Noonan JP, Pääbo S, Rubin EM. 2006. Accelerated evolution of conserved  
639 noncoding sequences in humans. *Science* **314**:786-786. doi: [10.1126/science.1130738](https://doi.org/10.1126/science.1130738).
- 640 **Prado-Martinez J**, Sudmant PH, Kidd JM, Li H, Kelley JL, Lorente-Galdos B, Veeramah  
641 KR, Woerner AE, O'Connor TD, Santpere G, Cagan A, Theunert C, Casals F, Laayouni H,  
642 Munch K, Hobolth A, Halager AE, Malig M, Hernandez-Rodriguez J, Hernando-Herraez I,  
643 Prüfer K, Pybus M, Johnstone L, Lachmann M, Alkan C, Twigg D, Petit N, Baker C,  
644 Hormozdiari F, Fernandez-Callejo M, Dabad M, Wilson ML, Stevison L, Camprubí C,  
645 Carvalho T, Ruiz-Herrera A, Vives L, Mele M, Abello T, Kondova I, Bontrop RE, Pusey  
646 A, Lankester F, Kiyang JA, Bergl RA, Lonsdorf E, Myers S, Ventura M, Gagneux P,  
647 Comas D, Siegmund H, Blanc J, Agueda-Calpena L, Gut M, Fulton L, Tishkoff SA,  
648 Mullikin JC, Wilson RK, Gut IG, Gonder MK, Ryder OA, Hahn BH, Navarro A, Akey JM,

649 Bertranpetit J, Reich D, Mailund T, Schierup MH, Hvilsom C, Andrés AM, Wall JD,  
650 Bustamante CD, Hammer MF, Eichler EE, Marques-Bonet T. 2013. Great ape genetic  
651 diversity and population history. *Nature* **499**:471-475. doi: [10.1038/nature12228](https://doi.org/10.1038/nature12228).

652 **Preuss TM**. 2012. Human brain evolution: From gene discovery to phenotype discovery.  
653 *Proceedings of the National Academy of Sciences of the United States of America*  
654 **109**:10709-10716. doi: [10.1073/pnas.1201894109](https://doi.org/10.1073/pnas.1201894109).

655 **Prossellkov P**, Polygalov D, Zhang Q, McHugh TJ, Itohara S. 2015. Cognitive Domains  
656 function complementation by *NTNG* gene paralogs. *bioRxiv* doi:  
657 <http://dx.doi.org/10.1101/034413>.

658 **Prüfer K**, Racimo F, Patterson N, Jay F, Sankararaman S, Sawyer S, Heinze A, Renaud G,  
659 Sudmant PH, de Filippo C, Li H, Mallick S, Dannemann M, Fu Q, Kircher M, Kuhlwilm  
660 M, Lachmann M, Meyer M, Ongyerth M, Siebauer M, Theunert C, Tandon A, Moorjani P,  
661 Pickrell J, Mullikin JC, Vohr SH, Green RE, Hellmann I, Johnson PLF, Blanche H, Cann  
662 H, Kitzman JO, Shendure J, Eichler EE, Lein ES, Bakken TE, Golovanova LV,  
663 Doronichev VB, Shunkov MV, Derevianko AP, Viola B, Slatkin M, Reich D, Kelso J,  
664 Pääbo S. 2013. The complete genome sequence of a Neanderthal from the Altai  
665 Mountains. *Nature* **505**:43–49. doi: [10.1038/nature12886](https://doi.org/10.1038/nature12886).

666 **Rasmussen M**, Li YR, Lindgreen S, Pedersen JS, Albrechtsen A, Moltke I, Metspalu M,  
667 Metspalu E, Kivisild T, Gupta R, Bertalan M, Nielsen K, Gilbert MTP, Wang Y,  
668 Raghavan M, Campos PF, Kamp HM, Wilson AS, Gledhill A, Tridico S, Bunce M,  
669 Lorenzen ED, Binladen J, Guo XS, Zhao J, Zhang XQ, Zhang H, Li Z, Chen MF, Orlando  
670 L, Kristiansen K, Bak M, Tommerup N, Bendixen C, Pierre TL, Grønnow B, Meldgaard  
671 M, Andreasen C, Fedorova SA, Osipova LP, Higham TFG, Ramsey CB, Hansen TVO,  
672 Nielsen FC, Crawford MH, Brunak S, Sicheritz-Pontén T, Vilems R, Nielsen R, Krogh A,  
673 Wang J, Willerslev E. 2010. Ancient human genome sequence of an extinct Palaeo-

674 Eskimo. *Nature* **463**:757-762. doi: [10.1038/nature08835](https://doi.org/10.1038/nature08835).

675 **Rietveld CA**, Medland SE, Derringer J, Yang J, Esko T, Martin NW, Westra HJ,  
676 Shakhbazov K, Abdellaoui A, Agrawal A, Albrecht E, Alizadeh BZ, Amin N, Bamard J,  
677 Baumeister SE, Benke KS, Bielak LF, Boatman JA, Boyle PA, Davies G, de Leeuw C,  
678 Eklund N, Evans DS, Ferhmann R, Fischer K, Gieger C, Gjessing HK, Hägg S, Harris JR,  
679 Hayward C, Holzapfel C, Ibrahim-Verbaas CA, Ingelsson E, Jacobsson B, Joshi PK,  
680 Jugessur A, Kaakinen M, Kanoni S, Karjalainen J, Kolcic I, Kristiansson K, Kutalik Z,  
681 Lahti J, Lee SH, Lin P, Lind PA, Liu YM, Lohman K, Loitfelder M, McMahon G, Vidal  
682 PM, Meirelles O, Milani L, Myhre R, Nuotio ML, Oldmeadow CJ, Petrovic KE, Peyrot  
683 WJ, Polašek O, Quaye L, Reinmaa E, Rice JP, Rizzi TS, Schmidt H, Schmidt R, Smith  
684 AV, Smith JA, Tanaka T, Terracciano A, van der Loos MJHM, Vitart V, Völzke H,  
685 Wellmann J, Yu L, Zhao W, Allik J, Attia JR, Bandinelli S, Bastardot F, Beauchamp J,  
686 Bennett DA, Berger K, Bierut LJ, Boomsma DI, Bültmann U, Campbell H, Chabris CF,  
687 Cherkas L, Chung MK, Cucca F, de Andrade M, De Jager PL, De Neve J-E, Deary IJ,  
688 Dedoussis GV, Deloukas P, Dimitriou M, Eiríksdóttir G, Elderson MF, Eriksson JG,  
689 Evans DM, Faul JD, Ferrucci L, Garcia ME, Grönberg H, Guonason V, Hall P, Harris JM,  
690 Harris TB, Hastie ND, Heath AC, Hernandez DG, Hoffmann W, Hofman A, Holle R,  
691 Holliday EG, Hottenga JJ, Iacono WG, Illig T, Järvelin MR, Kähönen M, Kaprio J,  
692 Kirkpatrick RM, Kowgier M, Latvala A, Launer LJ, Lawlor DA, Lehtimäki T, Li JM,  
693 Lichtenstein P, Lichtner P, Liewald DC, Madden PA, Magnusson PKE, Mäkinen TE,  
694 Masala M, McGue M, Metspalu A, Mielck A, Miller MB, Montgomery GW, Mukherjee S,  
695 Nyholt DR, Oostra BA, Palmer LJ, Palotie A, Penninx B, Perola M, Peyser PA, Preisig M,  
696 Räikkönen K, Raitakari OT, Realo A, Ring SM, Ripatti S, Rivadeneira F, Rudan I,  
697 Rustichini A, Salomaa V, Sarin AP, Schlessinger D, Scott RJ, Snieder H, St Pourcain B,  
698 Starr JM, Sul JH, Surakka I, Svento R, Teumer A, The LifeLines Cohort Study, Tiemeier

- 699 H, van Rooij FJA, Van Wagoner DR, Vartiainen E, Viikari J, Vollenweider P, Vonk JM,  
700 Waeber G, Weir DR, Wichmann H-E, Widen E, Willemsen G, Wilson JF, Wright AF,  
701 Conley D, Davey-Smith G, Franke L, Groenen PJF, Johannesson M, Kardina SLR, Krueger  
702 RF, Laibson D, Martin NG, Meyer MN, Posthuma D, Thurik AR, Timpson NJ,  
703 Uitterlinden AG, van Duijn CM, Visscher PM, Benjamin DJ, Cesarini D, Koellinger PD.  
704 2013. GWAS of 126,559 Individuals Identifies Genetic Variants Associated with  
705 Educational Attainment. *Science* **340**:1467-1471. doi: [10.1126/science.1235488](https://doi.org/10.1126/science.1235488).
- 706 **Rubinstein M and de Souza FSJ.** 2013. Evolution of transcriptional enhancers and animal  
707 diversity. *Philosophical Transactions of the Royal Society B-Biological Sciences*  
708 **368**:A20130017. doi: [10.1098/rstb.2013.0017](https://doi.org/10.1098/rstb.2013.0017).
- 709 **Sarkissian CD,** Allentoft ME, Ávila-Arcos MC, Barnett R, Campos PF, Cappellini E, Ermini  
710 L, Fernández R, da Fonseca R, Ginolhac A, Hansen AJ, Jónsson H, Korneliusson T,  
711 Margaryan A, Martin MD, Moreno-Mayar JV, Raghavan M, Rasmussen M, Velasco MS,  
712 Schroeder H, Schubert M, Seguin-Orlando A, Wales N, Gilbert MTP, Willerslev E,  
713 Orlando L. 2015. Ancient genomics. *Philosophical Transactions of the Royal Society B-*  
714 *Biological Sciences* **370**:20130387. doi: [10.1098/rstb.2013.0387](https://doi.org/10.1098/rstb.2013.0387).
- 715 **Sevcsik E,** Brameshuber M, Foelser M, Weghuber J, Honigmann A, Schuetz GJ. 2015. GPI-  
716 anchored proteins do not reside in ordered domains in the live cell plasma membrane.  
717 *Nature Communications* **6**:A6969. doi: [10.1038/ncomms7969](https://doi.org/10.1038/ncomms7969).
- 718 **Song M,** Zhou Y, Li J, Liu Y, Tian L, Yu C, Tianzi, J. 2008. Brain spontaneous functional  
719 connectivity and intelligence. *Neuroimage* **41**:1168-1176. doi:  
720 [10.1016/j.neuroimage.2008.02.036](https://doi.org/10.1016/j.neuroimage.2008.02.036).
- 721 **Spearman C.** 1904. "General intelligence" objectively determined and measured. *American*  
722 *Journal of Psychology* **15**:201-292. doi: [10.2307/1412107](https://doi.org/10.2307/1412107).
- 723 **Stolfi A,** Ryan K, Meinertzhagen IA, Christiaen L. 2015. Migratory neuronal progenitors



- 724 arise from the neural plate borders in tunicates. *Nature* **527**:371-374. doi:  
725 [10.1038/nature15758](https://doi.org/10.1038/nature15758).
- 726 **Sun KLW**, Correia JP, Kennedy TE. 2011. Netrins: versatile extracellular cues with diverse  
727 functions. *Development* **138**:2153-2169. doi: [10.1242/dev.044529](https://doi.org/10.1242/dev.044529).
- 728 **The Japanese Schizophrenia Sib-Pair Linkage Group (JSSLG)**, Arinami T, Ohtsuki T,  
729 Ishiguro H, Ujike H, Tanaka Y, Morita Y, Mineta M, Takeichi M, Yamada S, Imamura A,  
730 Ohara K, Shibuya H, Ohara, K, Suzuki Y, Muratake T, Kaneko N, Someya T, Inada T,  
731 Yoshikawa T, Toyota T, Yamada K, Kojima T, Takahashi S, Osamu O, Shinkai T,  
732 Nakamura M, Fukuzako H, Hashiguchi T, Niwa S, Ueno T, Tachikawa H, Hori T, Asada T,  
733 Nanko S, Kunugi H, Hashimoto R, Ozaki N, Iwata N, Harano M, Arai H, Ohnuma T,  
734 Kusumi I, Koyama T, Yoneda H, Fukumaki Y, Shibata H, Kaneko S, Higuchi H, Yasui-  
735 Furukori N, Numachi Y, Itokawa M, Okazaki Y. 2005. Genomewide high-density SNP  
736 linkage analysis of 236 Japanese families supports the existence of schizophrenia  
737 susceptibility loci on chromosomes 1p, 14q, and 20p. *American Journal of Human*  
738 *Genetics* **77**:937-944. doi: [10.1086/498122](https://doi.org/10.1086/498122).
- 739 **Wechsler D.** 1958. *The Measurement And Appraisal Of Adult Intelligence*, 4th edition. The  
740 Williams & Wilkins Company. 324 pp.
- 741 **Wilcox JA and Quadri S.** 2014. Replication of NTNG1 association in schizophrenia.  
742 *Psychiatric Genetics* **24**:266-268. doi: [10.1097/ypg.0000000000000061](https://doi.org/10.1097/ypg.0000000000000061).
- 743 **Wise SP.** 2008. Forward frontal fields: phylogeny and fundamental function. *Trends in*  
744 *Neurosciences* **31**:599-608. doi: [10.1016/j.tins.2008.08.008](https://doi.org/10.1016/j.tins.2008.08.008).
- 745 **Wong K.** 2015. Neandertal Minds. *Scientific American* **312**:36-43. doi:  
746 [10.1038/scientificamerican0215-36](https://doi.org/10.1038/scientificamerican0215-36).
- 747 **Wu JQ**, Wang X, Beveridge NJ, Tooney PA, Scott RJ, Carr VJ, Cairns MJ. 2012.  
748 Transcriptome Sequencing Revealed Significant Alteration of Cortical Promoter Usage



- 749 and Splicing in Schizophrenia. *PLoS One* **7**:e36351. doi: [10.1371/journal.pone.0036351](https://doi.org/10.1371/journal.pone.0036351).
- 750 **Yoon JH**, Sheremata SL, Rokem A, Silver MA. 2014. Windows to the soul: vision science as  
751 a tool for studying biological mechanisms of information processing deficits in  
752 schizophrenia. *Frontiers in Psychology* **4**:A681. doi: [10.3389/fpsyg.2014.00681](https://doi.org/10.3389/fpsyg.2014.00681).
- 753 **Yu S**, Guo Z, Johnson C, Gu G, Wu Q. 2013. Recent progress in synthetic and biological  
754 studies of GPI anchors and GPI-anchored proteins. *Current Opinion in Chemical Biology*  
755 **17**: 1006-1013. doi: [10.1016/j.cbpa.2013.09.016](https://doi.org/10.1016/j.cbpa.2013.09.016).
- 756 **Zakharyan R**, Boyajyan A, Arakelyan A, Gevorgyan A, Mrazek F, Petrek M. 2011.  
757 Functional variants of the genes involved in neurodevelopment and susceptibility to  
758 schizophrenia in an Armenian population. *Human Immunology* **72**:746-748. doi:  
759 [10.1016/j.humimm.2011.05.018](https://doi.org/10.1016/j.humimm.2011.05.018).
- 760 **Zhu Y**, Yang H, Bi Y, Zhang Y, Zhen C, Xie S, Qin H, He J, Liu L, Liu Y. 2011. Positive  
761 association between *NTNG1* and schizophrenia in Chinese Han population. *Journal of*  
762 *Genetics* **90**:499-502.
